# Supplementary material for: Investigating the contribution of grown new particles to cloud condensation nuclei with largely varying preexisting particles – Part 2: Modeling chemical drivers and 3-D new particle formation occurrence
Source: Copernicus journal article supplement (doi:10.5194/acp-24-6769-2024), 2024-06-12
Supplement: Supplementary file 1 [file acp-24-6769-2024-supplement.pdf]

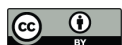

*Supplement of*

**Investigating the contribution of grown new particles to cloud condensation nuclei with largely varying preexisting particles – Part 2: Modeling chemical drivers and 3-D new particle formation occurrence**

**Ming Chu et al.**

*Correspondence to:* Yang Gao ([yanggao@ouc.edu.cn](mailto:yanggao@ouc.edu.cn)) and Xiaohong Yao ([xhyao@ouc.edu.cn](mailto:xhyao@ouc.edu.cn))

The copyright of individual parts of the supplement might differ from the article licence.

1 **Figure legends:**

2 **Fig. S1** Time series of simulated and observed particle mass concentrations of  $\text{SO}_4^{2-}$  (a),  $\text{NO}_3^-$  (b),  $\text{NH}_4^+$   
3 (c) and organics (d) in  $\text{PM}_{1.0}$  at an urban site (39.98°N, 116.39°E) in Beijing from June 23 to July 14 and  
4 the comparison between the simulated and observed  $\text{SO}_4^{2-}$  (e),  $\text{NO}_3^-$  (f),  $\text{NH}_4^+$  (g) and organics (h) during  
5 the frequent-NPF period of June 29–July 6 (the MFB, MFE and R in parentheses are calculated with the  
6 data excluding July 5, empty symbols in e-h represent the data on July 5).

7 **Fig. S2** Time series of the observed and modeled  $\text{PM}_{2.5}$  mass concentrations from June 23 to July 14 in  
8 Beijing downtown (a: 39.86°N, 116.36°E) and Beijing suburb (b: 40.19°N, 116.23°E), the comparison  
9 of the modeled and observed  $\text{PM}_{2.5}$  during the frequent-NPF period in Beijing downtown (c) and Beijing  
10 suburb (d, the MFB, MFE and R in parentheses are calculated with the data excluding July 5).

11 **Fig. S3** Simulated concentrations of  $\text{H}_2\text{SO}_4$  vapor on July 1–2 and the ranges of observational values  
12 reported in the literature (Two endpoints reported by Lu et al. (2019) and Wang et al. (2021) represent  
13 the maximum and minimum values, respectively).

14 **Fig. S4** Diurnal variations in modeled chemical components in 10–40 nm particles and 40–250 nm  
15 particles: (a)  $\text{SO}_4^{2-}$ , (b)  $\text{NO}_3^-$ , (c)  $\text{NH}_4^+$  (d) organics on July 3–4; fractions of chemical species in 10–40  
16 nm particles at 15:00 (e), in 40–250 nm particles at 15:00 (f), in 10–40 nm particles at 22:00 (g), and in  
17 40–250 nm particles at 22:00 on July 3.

18 **Fig. S5** Diurnal variation in modeled chemical components in 10–40 nm particles and 40–250 nm  
19 particles:  $\text{SO}_4^{2-}$  (a),  $\text{NO}_3^-$  (b),  $\text{NH}_4^+$  (c), organics (d) on July 6–7; fractions of chemical species in 10–40  
20 nm particles (e) and 40–250 nm particles (f) at 12:00, those at 17:00 (g and h) and those at 22:00 on July  
21 6 (i and j).

22 **Fig. S6** Comparison of the simulations with observations of CCN number concentration during the NPF  
23 events on July 1, 3, 6 at 0.2 % SS (a–c) and 0.4 % SS (d–f) (a and d on July 1; b and e on July 3; c and f  
24 on July 6).

25 **Fig. S7** The simulated chemical components in 10–40 nm particles at 500 m, 1500 m and 2500 m above  
26 the ground respectively at 10:00 (a), 15:00 (b), 22:00 (c) on July 3 and 3:00 (d) on July 4.

27 **Fig. S8** The simulated chemical components in 10–40 nm particles at 500 m, 1500 m and 2500 m above  
28 the ground respectively at 12:00 (a), 15:00 (b), 18:00 (c) on July 6.

29 **Fig. S9** Horizontal distributions of  $\text{CN}_{10}$  at ~1300 m a.s.l. (a, the upper row) and on the ground level (a,  
30 the bottom row) at 08:00, 09:00, 12:00, 17:00 and 18:00 on July 3, 2019 (red and blue solid dots represent  
31 the observation site and point A, respectively; the direction and length of black arrow represent the wind  
32 direction and wind speed, respectively); Vertical profiles of  $\text{CN}_{10}$  over the observation site (red solid line)  
33 and point A (blue dashed line) from 0:00 to 22:00 on 3 July 2019 (b, the Y-axis coordinate is the height  
34 above ground; the red and blue solid dots represent the height of the PBL over the observation site and  
35 point A, and PBL exceeding 3000 meters above ground are not shown in Figure).

36 **Fig. S10** Horizontal distribution of  $\text{CN}_{10}$  at ~1300 m a.s.l. (a, the upper row) and on ground (a, the bottom  
37 row) in NPF event occurred on July 6, 2019 at 10:00, 11:00, 14:00, 17:00 and 18:00 (the red and blue  
38 solid dots represent the observation site and point A, respectively; the direction and size of the black  
39 arrow represent the wind direction and wind speed, respectively); Vertical profiles of  $\text{CN}_{10}$  over the  
40 observational site (red solid line) and point A (blue dashed line) from 0:00 to 22:00 on July 6, 2019 (b,  
41 the Y-axis coordinate is the height above the ground; the red and blue solid dots represent the height of  
42 the PBL over the observational site and point A, and PBL exceeding 3000 meters above the ground are  
43 not shown in Figure).

1 **Fig. S11** Horizontal distribution of  $\text{CN}_{40-250}$  on ground (a, the upper row) and vertical profiles of  $\text{CN}_{40-}$   
2  $_{250}$  over the observation site (red solid line), point A (blue dashed line) and point B (black dashed line)  
3 from 18:00 on July 3 to 04:00 on July 4 (b, the Y-axis coordinate is the height above the ground; the red,  
4 blue and black solid dots represent the height of the PBL over the observation site, point A and point B,  
5 and PBL exceeding 3000 meters above the ground are not shown in Figure).

6 **Table legends:**

7 **Table S1.** Parameter scheme setting in WRF-Chem model

8

1 Figures

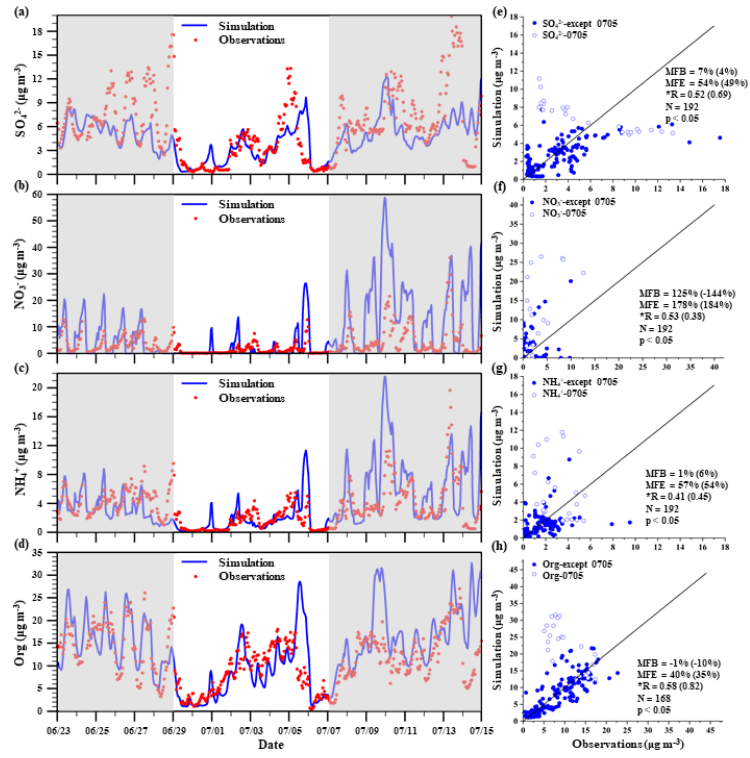

2

3 Fig. S1

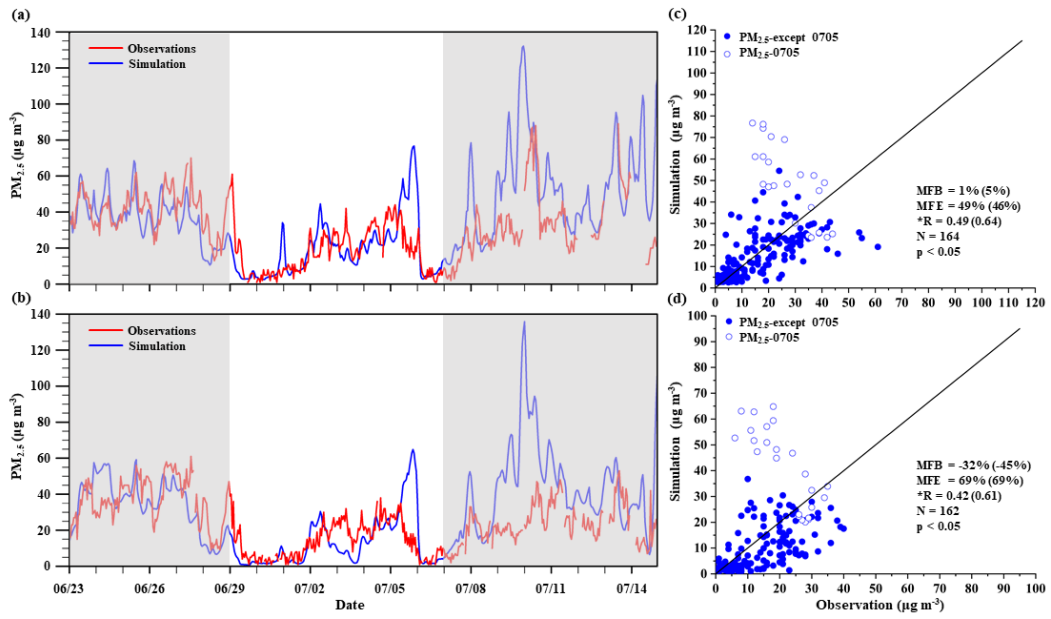

Fig. S2

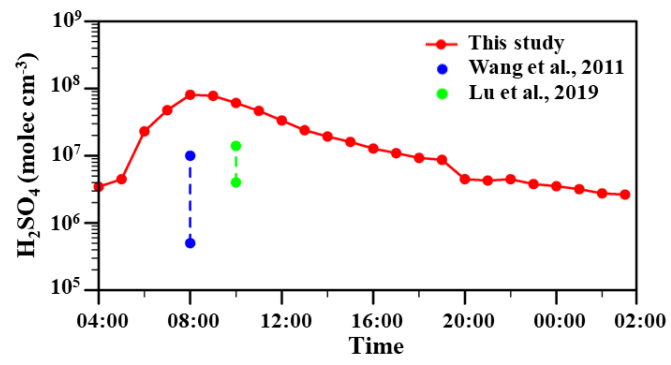

Fig. S3

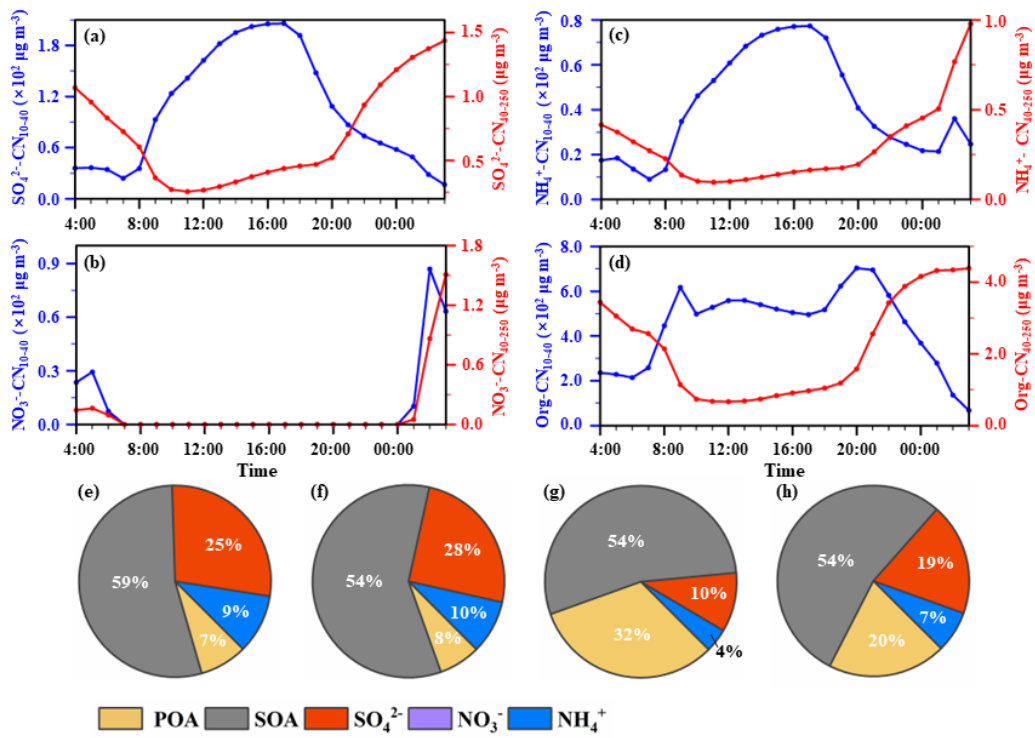

Fig. S4

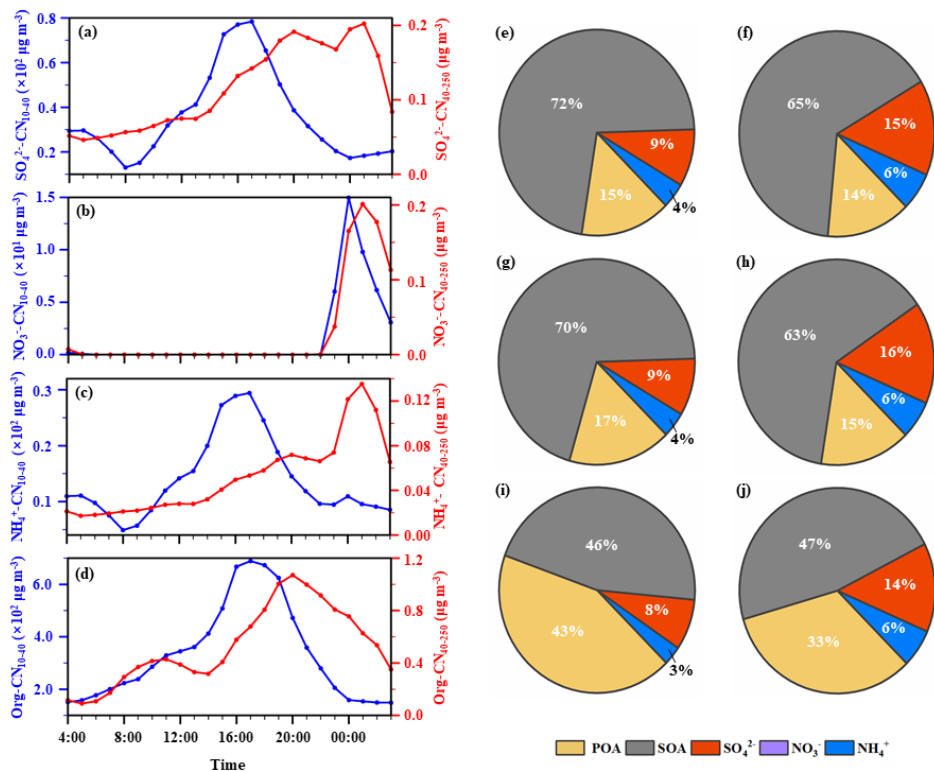

Fig. S5



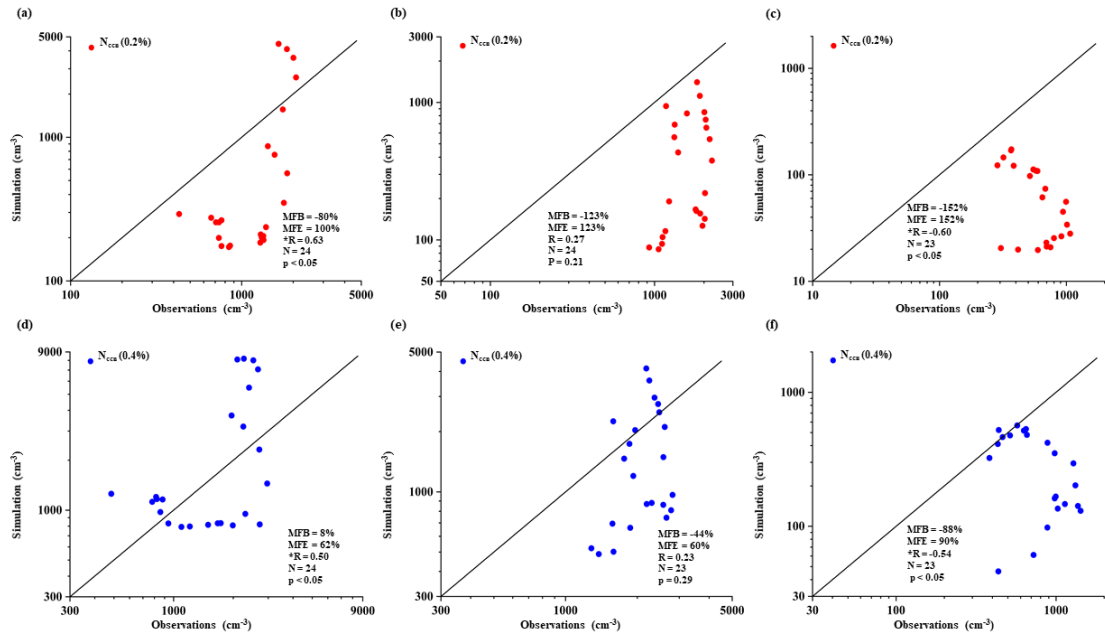

Fig. S6

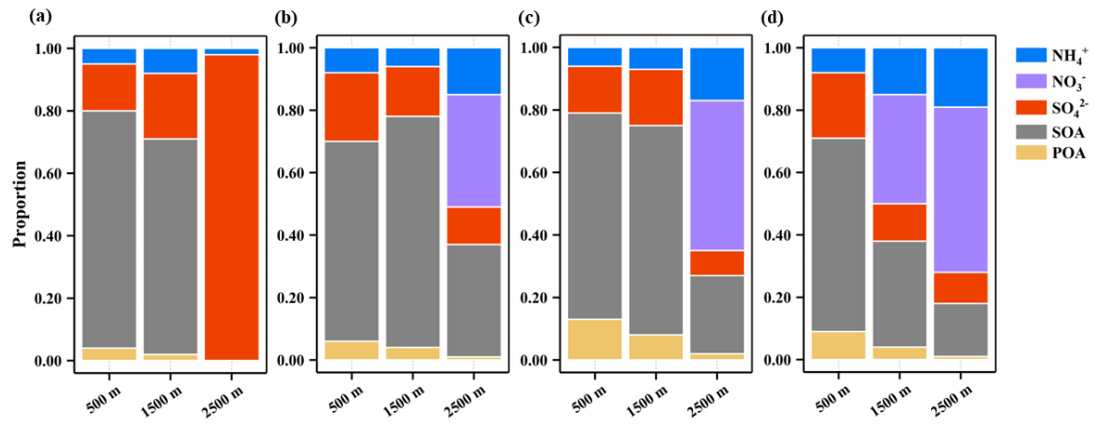

Fig. S7

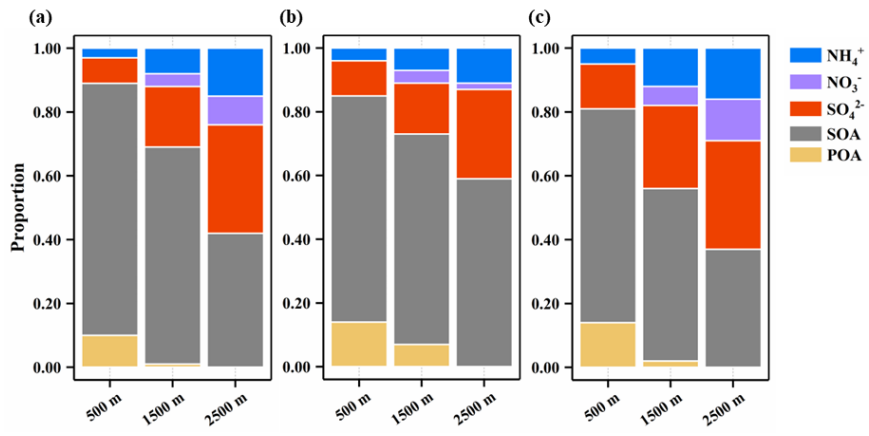

Fig. S8

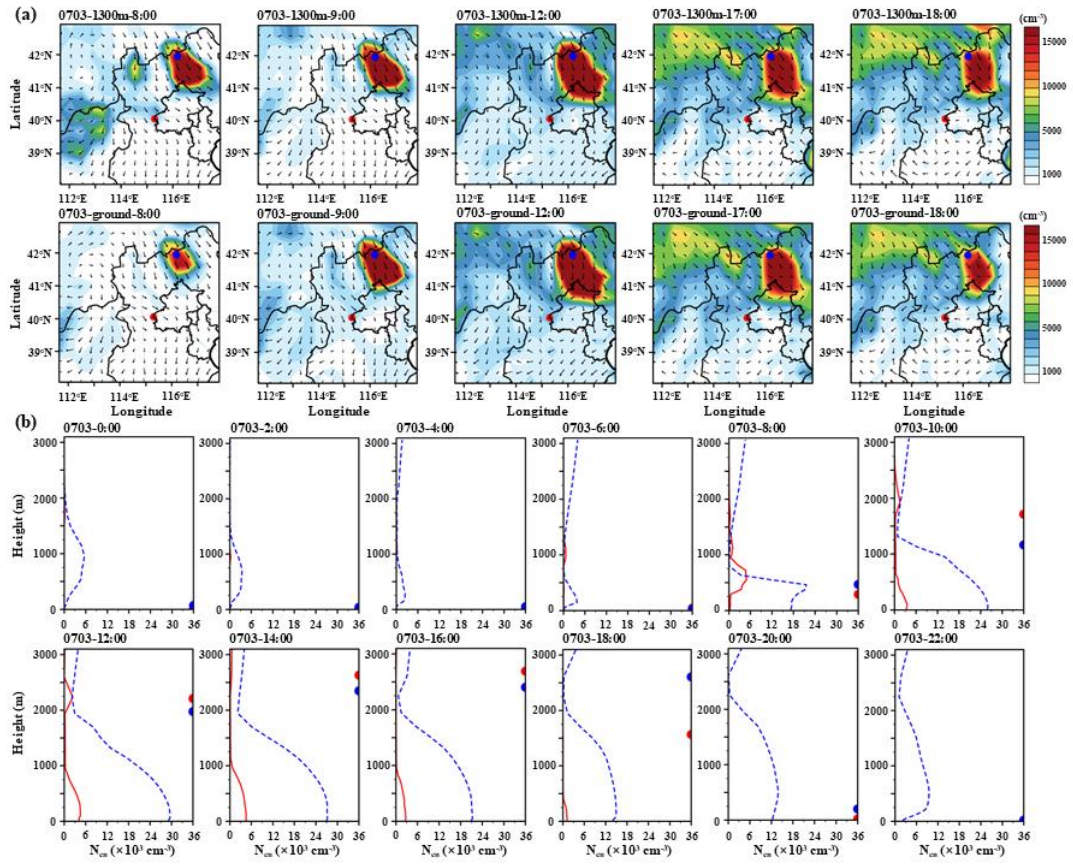

Fig. S9

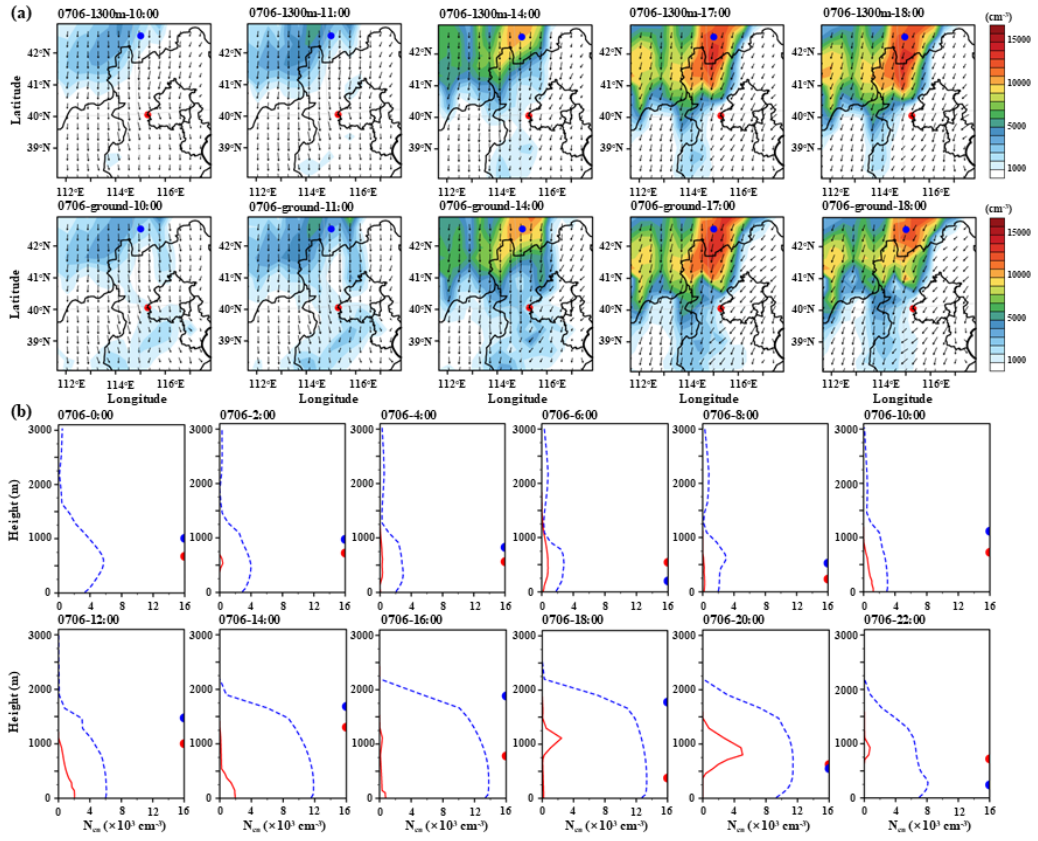

Fig. S10

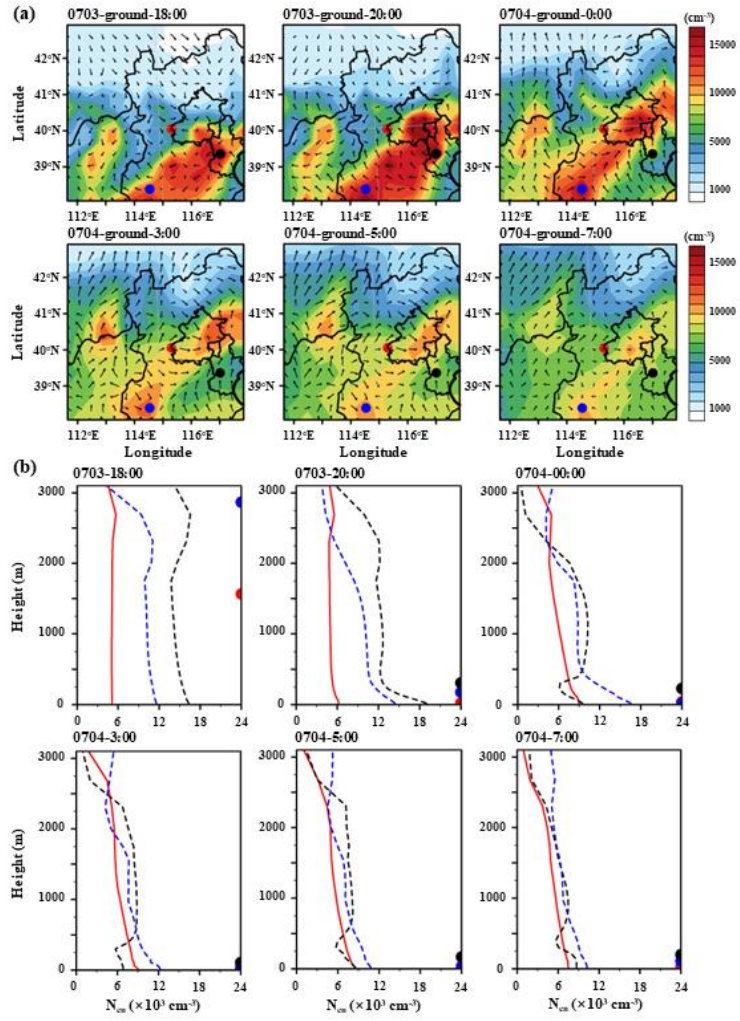

Fig. S11

**Table****Table S1 Parameter scheme setting in WRF-Chem model**

| <b>Atmospheric process</b>    | <b>Model scheme</b>                       |
|-------------------------------|-------------------------------------------|
| <b>Meteorological process</b> |                                           |
| Longwave radiation            | RRTMG (Iacono et al., 2008)               |
| Shortwave radiation           | RRTMG (Iacono et al., 2008)               |
| Land surface model            | Unified Noah LSM (Tewari et al., 2016)    |
| PBL scheme                    | YSU (Tewari et al., 2016)                 |
| Cumulus                       | Grell 3D (Grell and Dévényi, 2002)        |
| Micro Physics                 | Morrison 2-moment (Morrison et al., 2009) |
| <b>Chemical process</b>       |                                           |
| Gas-phase chemistry           | SAPRC99 (Carter, 2000)                    |
| Photolysis                    | Madronich F-TUV (Madronich, 1987)         |
| Aerosol chemistry             | MOSAIC (Zaveri et al., 2008)              |
| Anthropogenic                 | Modified MEIC2016                         |
| Biogenic emissions            | MEGAN v2.03                               |

## References

- Carter, W.: Additions And Corrections To The Saprc-99 Maximum Incremental Reactivity (mir) Scale, 2000.
- 5 Grell, G. A. and Dévényi, D.: A generalized approach to parameterizing convection combining ensemble and data assimilation techniques, *Geophys. Res. Lett.*, 29, 38-31-38-34, <https://doi.org/10.1029/2002GL015311>, 2002.
- Iacono, M. J., Delamere, J. S., Mlawer, E. J., Shephard, M. W., Clough, S. A., and Collins, W. D.: Radiative forcing by long-lived greenhouse gases: Calculations with the AER radiative transfer models, *J. Geophys. Res.*, 113, D13103, <https://doi.org/10.1029/2008JD009944>, 2008.
- 10 Lu, Y. Q., Yan, C., Fu, Y. Y., Chen, Y., Liu, Y. L., Yang, G., Wang, Y. W., Bianchi, F., Chu, B. W., Zhou, Y., Yin, R. J., Baalbaki, R., Garmash, O., Deng, C. J., Wang, W. G., Liu, Y. C., Petaja, T., Kerminen, V. M., Jiang, J. K., Kulmala, M., and Wang, L.: A proxy for atmospheric daytime gaseous sulfuric acid concentration in urban Beijing, *Atmos. Chem. Phys.*, 19, 1971-1983, 10.5194/acp-19-1971-2019, 2019.
- 15 Madronich, S.: Photodissociation in the atmosphere: 1. Actinic flux and the effects of ground reflections and clouds, *J. Geophys. Res.*, 92, 9740-9752, <https://doi.org/10.1029/JD092iD08p09740>, 1987.
- Morrison, H., Thompson, G., and Tatarskii, V.: Impact of Cloud Microphysics on the Development of Trailing Stratiform Precipitation in a Simulated Squall Line: Comparison of One- and Two-Moment Schemes, *Mon. Weather. Rev.*, 137, 991-1007, <https://doi.org/10.1175/2008MWR2556.1>, 2009.
- 20 Tewari, M., Chen, F., Wang, W., Dudhia, J., and Cuenca, R. H.: Implementation and verification of the united NOAH land surface model in the WRF model, 20th Conference on Weather Analysis and Forecasting/16th Conference on Numerical Weather Prediction,
- Wang, Z. B., Hu, M., Yue, D. L., Zheng, J., Zhang, R. Y., Wiedensohler, A., Wu, Z. J., Nieminen, T., and Boy, M.: Evaluation on the role of sulfuric acid in the mechanisms of new particle formation for Beijing case, *Atmos. Chem. Phys.*, 11, 12663-12671, 10.5194/acp-11-12663-2011, 2011.
- 25 Zaveri, R. A., Easter, R. C., Fast, J. D., and Peters, L. K.: Model for Simulating Aerosol Interactions and Chemistry (MOSAIC), *Journal of Geophysical Research Atmospheres*, 113, <https://doi.org/10.1029/2007JD008782>, 2008.
